# Supplementary material for: The utilization of Fe-doped g-C3N4 in a heterogeneous photo-Fenton-like catalytic system: the effect of different parameters and a system mechanism investigation
Source: PubMed Central journal article supplement — RSC Adv. 2020 Jun 9;10(37):21876–86. doi: 10.1039/d0ra00993h (PMC9054560; doi:10.1039/d0ra00993h), 2020-06-09
Supplement: RA-010-D0RA00993H-s001.pdf [file RA-010-D0RA00993H-s001.pdf]

1 **Supplementary Files**

2

3 **Utilization of Fe doped g-C<sub>3</sub>N<sub>4</sub> in heterogeneous photo-Fenton-like**  
4 **catalytic system: different parameters effect and system mechanism**  
5 **investigation**

6 Wei Luo <sup>1</sup> • Wenyu Huang <sup>1,2\*</sup> • Xiaoqing Feng <sup>1</sup> • Ying Huang <sup>1</sup> • Xiongwei Song <sup>1</sup> • Hongfei Lin <sup>2</sup> •

7 Shuangfei Wang <sup>2,3</sup> • Gilles Mailhot <sup>4</sup>

8 <sup>1</sup>College of Resources, Environment and Materials, Guangxi University, Nanning 530004, PR China

9 <sup>2</sup>Guangxi Bossco Environmental Protection Technology Co., Ltd, Nanning, 530007, China

10 <sup>3</sup>Guangxi Key Laboratory of Clean Pulp & Papermaking and Pollution Control, Guangxi University,

11 Nanning 530004, China

12 <sup>4</sup>Université Clermont Auvergne, CNRS, SIGMA Clermont, Institut de Chimie de Clermont-Ferrand, F-

13 63000 Clermont-Ferrand, France

14

15

16

17

18

19

20

21

22

23

24

25

26

27

28

29

30 \*Corresponding author.

31 E-mail address: [huangwenyu@gxu.edu.cn](mailto:huangwenyu@gxu.edu.cn) (Wenyu Huang)

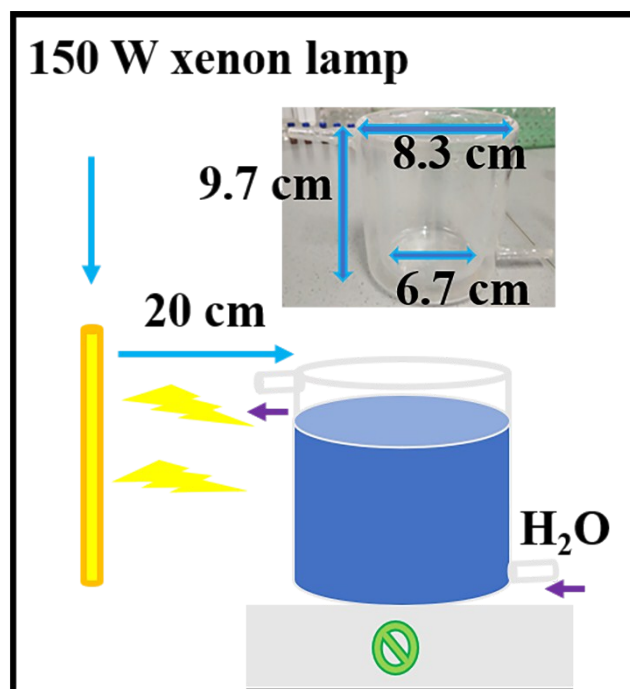

32  
33

Fig. S1 Schematic diagram of photocatalytic reactor

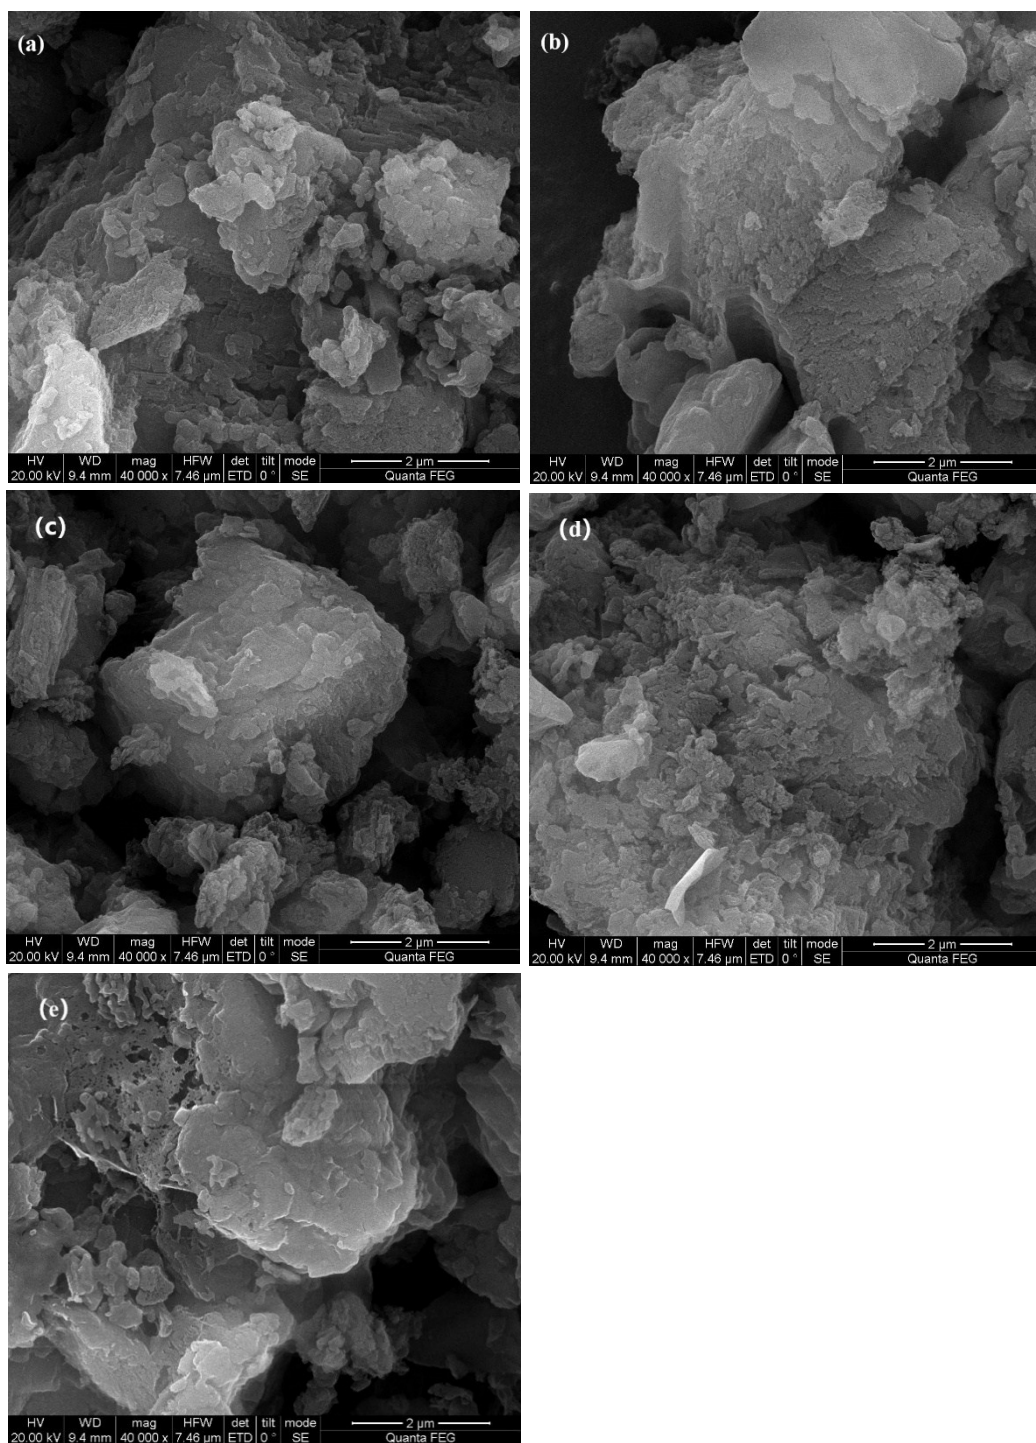

34

35 Fig. S2. SEM images of g-C<sub>3</sub>N<sub>4</sub> (a), 0.5 wt% Fe-C<sub>3</sub>N<sub>4</sub> (b), 1 wt% Fe-C<sub>3</sub>N<sub>4</sub> (c), 2 wt% Fe-C<sub>3</sub>N<sub>4</sub> (d) and 5  
 36 wt% Fe-C<sub>3</sub>N<sub>4</sub> (e).

37

38

39

40

41

42

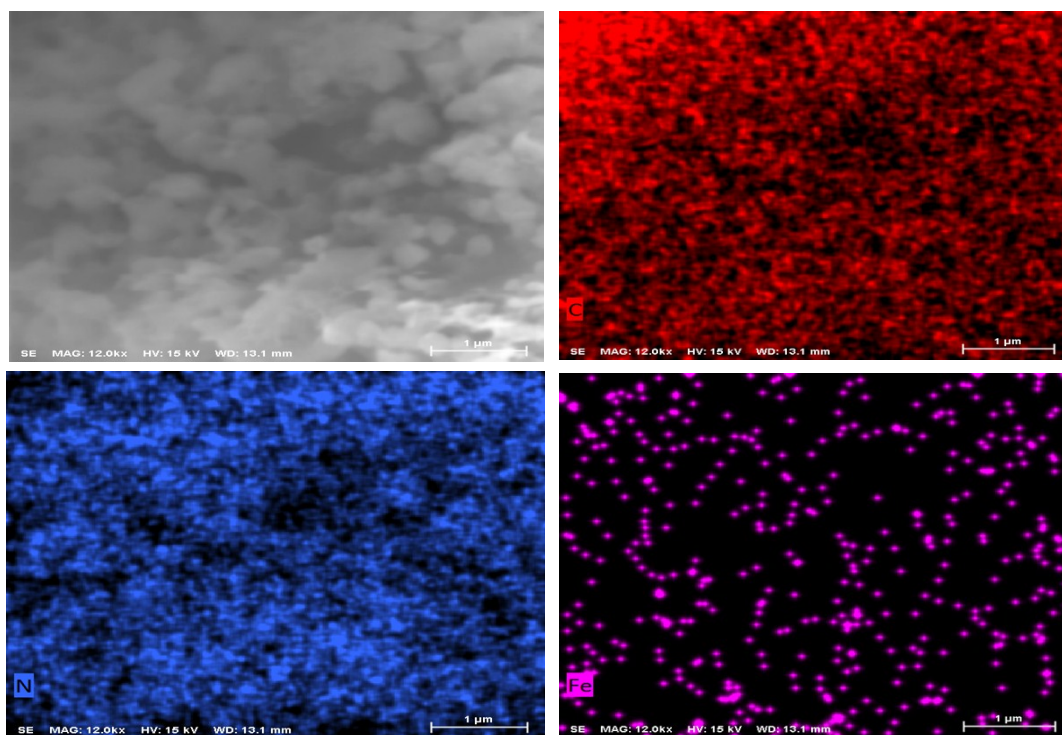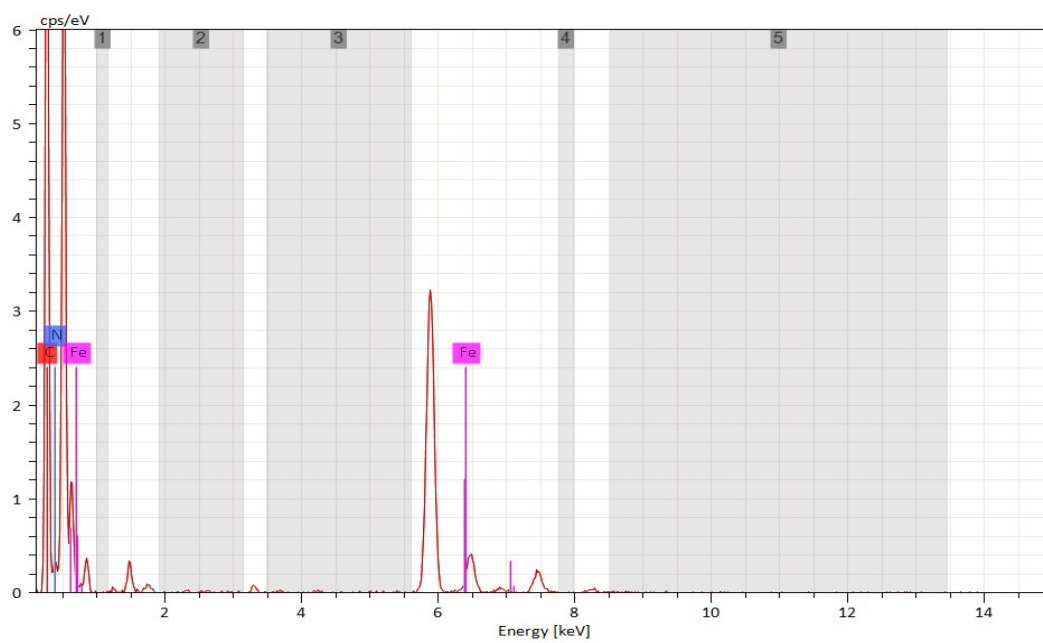

44

SPU0

| Element  | At. No. | Netto      | Mass [%]      | Mass Norm. [%] | Atom [%]      | abs. error [%] (1 sigma) | rel. error [%] (1 sigma) |
|----------|---------|------------|---------------|----------------|---------------|--------------------------|--------------------------|
| Carbon   | 6       | 24745      | 69.58         | 69.58          | 76.82         | 8.75                     | 12.58                    |
| Nitrogen | 7       | 1077       | 22.49         | 22.49          | 21.30         | 5.02                     | 22.30                    |
| Iron     | 26      | 1575       | 7.93          | 7.93           | 1.88          | 0.35                     | 4.45                     |
|          |         | <b>Sum</b> | <b>100.00</b> | <b>100.00</b>  | <b>100.00</b> |                          |                          |

45

46

47

48

Fig. S3. The SEM-EDS mapping images of 5% Fe-C<sub>3</sub>N<sub>4</sub>

49  
50  
51

Table.S1. The rate constant of MB in different inorganic anions condition.

| Inorganic anions              | Concentration (mM) | K (min <sup>-1</sup> ) | R <sup>2</sup> |
|-------------------------------|--------------------|------------------------|----------------|
| Cl <sup>-</sup>               | 0                  | 0.0303                 | 0.9929         |
|                               | 10                 | 0.0260                 | 0.9948         |
|                               | 20                 | 0.0238                 | 0.9732         |
|                               | 50                 | 0.0174                 | 0.9980         |
|                               | 100                | 0.0187                 | 0.9903         |
| HCO <sub>3</sub> <sup>-</sup> | 0                  | 0.0303                 | 0.9929         |
|                               | 10                 | 0.0253                 | 0.9869         |
|                               | 20                 | 0.0299                 | 0.9893         |
|                               | 50                 | 0.0405                 | 0.9797         |
|                               | 100                | 0.0372                 | 0.9907         |
| NO <sub>3</sub> <sup>-</sup>  | 0                  | 0.0303                 | 0.9929         |
|                               | 10                 | 0.0216                 | 0.9967         |
|                               | 20                 | 0.0195                 | 0.9976         |
|                               | 50                 | 0.0245                 | 0.9952         |
|                               | 100                | 0.0198                 | 0.9921         |

52  
53  
54  
55  
56  
57  
58  
59  
60  
61  
62  
63  
64  
65  
66  
67  
68  
69  
70  
71  
72  
73

74

75

Table.S2. The rate constant of MB in different inorganic cations condition.

| Inorganic cations | Concentration (mM) | K (min <sup>-1</sup> ) | R <sup>2</sup> |
|-------------------|--------------------|------------------------|----------------|
| Al <sup>3+</sup>  | 0                  | 0.0303                 | 0.9929         |
|                   | 5                  | 0.0180                 | 0.9958         |
|                   | 10                 | 0.0147                 | 0.9900         |
|                   | 20                 | 0.0136                 | 0.9875         |
|                   | 30                 | 0.0105                 | 0.9619         |
|                   | 0                  | 0.0303                 | 0.9929         |
| Mg <sup>2+</sup>  | 5                  | 0.0270                 | 0.9993         |
|                   | 10                 | 0.0232                 | 0.9998         |
|                   | 20                 | 0.0224                 | 0.9985         |
|                   | 30                 | 0.0218                 | 0.9989         |
|                   | 0                  | 0.0303                 | 0.9929         |
| Ca <sup>2+</sup>  | 5                  | 0.0236                 | 0.9997         |
|                   | 10                 | 0.0213                 | 0.9985         |
|                   | 20                 | 0.0201                 | 0.9898         |
|                   | 30                 | 0.0191                 | 0.9936         |
|                   | 0                  | 0.0303                 | 0.9929         |

76

77

78

79

80

81

82

83

84

85

86

87

88

89

90

91

92

93 Table.S3. The possible intermediates of MB in the in the Fe-C<sub>3</sub>N<sub>4</sub> heterogenous photo-Fenton-like  
94 system.

95

| Number | Molecular formula                                 | m/z    | Possible structural formula                                                           |
|--------|---------------------------------------------------|--------|---------------------------------------------------------------------------------------|
| a      | C <sub>16</sub> H <sub>18</sub> N <sub>3</sub> S  | 284.15 | 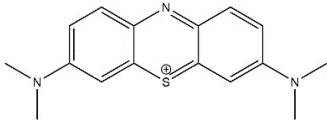    |
| b      | C <sub>16</sub> H <sub>19</sub> N <sub>3</sub> SO | 301.17 |     |
| c      | C <sub>16</sub> H <sub>23</sub> N <sub>3</sub> SO | 305.16 |     |
| d      | C <sub>7</sub> H <sub>5</sub> NS                  | 135.12 |    |
| e      | C <sub>6</sub> H <sub>7</sub> N                   | 93.04  |  |
| f      | C <sub>6</sub> H <sub>7</sub> NO                  | 109.10 |  |
| g      | C <sub>6</sub> H <sub>6</sub> O                   | 95.09  |  |
| h      | C <sub>6</sub> H <sub>13</sub> NO <sub>2</sub>    | 130.16 |   |
| j      | C <sub>6</sub> H <sub>6</sub> O <sub>4</sub>      | 143.09 |   |
| k      | C <sub>2</sub> H <sub>2</sub> O <sub>3</sub>      | 75.03  |  |

96
